# Supplementary material
Source: PubMed Central journal article supplement (PMC4649641)
Supplement: 10.1534_115.179879_genetics.115.179879-2.pdf [file 10.1534_115.179879_genetics.115.179879-2.pdf]

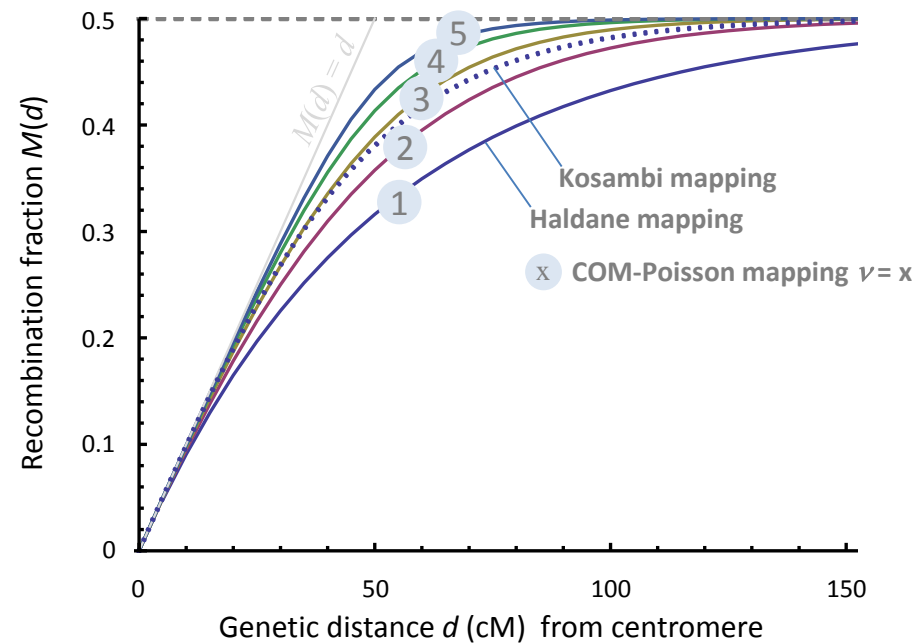

**Supporting Figure S2:** Mapping functions under different degrees of interference.  $M(d)$  is the recombination fraction as a function of the distance  $d$  (in Morgan) from the centromere and different degrees of interference as measured by the level of underdispersion  $\nu$  of the COM-Poisson distribution describing the number of crossing-over per unit of genetic map distance. The case  $\nu = 1$  corresponds to zero interference (Haldane mapping), while Kosambi mapping is close to the case  $\nu = 3$ .
