# Supplementary material
Source: PubMed Central journal article supplement (PMC4649641)
Supplement: 10.1534_115.179879_genetics.115.179879-3.pdf [file 10.1534_115.179879_genetics.115.179879-3.pdf]

**Supporting Table S2:** Average heterozygosity at microsatellite loci among offspring from single clone cultures and the position in of the microsatellites with respect to the centromere

| <b>Locus</b> | <b>Scaffold (<i>D. magna</i> assembly 2.4)</b> | <b>Position on scaffold (base pairs)</b> | <b>Linkage group (v4.0.1)</b> | <b>Distance from centromere (cM)</b> | <b><i>N</i><sup>a</sup></b> | <b>Heterozygosity (confidence limits)</b> |
|--------------|------------------------------------------------|------------------------------------------|-------------------------------|--------------------------------------|-----------------------------|-------------------------------------------|
| B008         | scaffold03124                                  | 1781052                                  | 6                             | 25.8                                 | 5                           | 0 (0 – 0.40)                              |
| B030         | scaffold00243                                  | 463057                                   | 3                             | 32.9                                 | 27                          | 0.59 (0.41 – 0.76)                        |
| B050         | scaffold02066                                  | 483524                                   | 3                             | 77.6                                 | 22                          | 0.77 (0.56 – 0.90)                        |
| B064         | scaffold00443                                  | 151077                                   | 1                             | 37.9                                 | 27                          | 0.63 (0.44 – 0.79)                        |
| B074         | contig23904                                    | 1149                                     | unmapped                      | NA                                   | 27                          | 0.78 (0.59 – 0.90)                        |
| B096         | scaffold01005                                  | 1506200                                  | 9                             | 3.6                                  | 22                          | 0.36 (0.20 – 0.57)                        |
| B107         | scaffold00763                                  | 136826                                   | 1                             | 100.0                                | 22                          | 0.59 (0.30 – 0.77)                        |

<sup>a</sup>*N* refers to the number of genotyped offspring from heterozygous parents
