# Supplementary material
Source: PubMed Central journal article supplement (PMC4649641)
Supplement: 10.1534_115.179879_genetics.115.179879-7.pdf [file 10.1534_115.179879_genetics.115.179879-7.pdf]

**Supporting Table S3:** Number of loci and average heterozygosity per linkage group in automicitic and self-fertilized offspring

| <b>Linkage group</b> | <b>N loci automicitic offspring</b> | <b>Average heterozygosity</b> | <b>N loci selfed offspring</b> | <b>Average heterozygosity</b> |
|----------------------|-------------------------------------|-------------------------------|--------------------------------|-------------------------------|
| LG1                  | 386                                 | 0.64                          | 222                            | 0.71                          |
| LG2                  | 355                                 | 0.69                          | 318                            | 0.68                          |
| LG3                  | 282                                 | 0.58                          | 131                            | 0.63                          |
| LG4                  | 263                                 | 0.56                          | 135                            | 0.49                          |
| LG5                  | 209                                 | 0.51                          | 151                            | 0.56                          |
| LG6                  | 250                                 | 0.54                          | 141                            | 0.64                          |
| LG7                  | 200                                 | 0.45                          | 168                            | 0.62                          |
| LG8                  | 192                                 | 0.48                          | 137                            | 0.54                          |
| LG9                  | 212                                 | 0.25                          | 107                            | 0.63                          |
| LG10                 | 174                                 | 0.54                          | 100                            | 0.46                          |
| <b>Average</b>       |                                     | <b>0.54</b>                   |                                | <b>0.60</b>                   |
| <b>Sum</b>           | <b>2523</b>                         |                               | <b>1610</b>                    |                               |
