# Supplementary material
Source: PubMed Central journal article supplement (PMC4649641)
Supplement: 10.1534_115.179879_genetics.115.179879-8.pdf [file 10.1534_115.179879_genetics.115.179879-8.pdf]

## File S2:

### Expected offspring heterozygosity under central vs. terminal fusion

Expected heterozygosity  $H(d)$  at a distance  $d$  (in Morgan) from the centromere can be computed in two steps. The first step is to derive expected heterozygosity  $H(x)$  for any fixed number  $x$  of crossovers between the marker and the centromere. This can be obtained by recurrence. Under terminal fusion, we have

$$H(x + 1) = 1 - H(x) + H(x)/2 \quad (\text{A1})$$

Indeed, if the marker was homozygous ( $1-H(x)$ ), it becomes heterozygous with an additional crossing over, and if it was already heterozygous, there is only one chance over two that it will remain heterozygous with an additional crossing over ( $H(x)/2$ ). Hence, with  $H(0) = 0$  (i.e., terminal fusion), we obtain

$$H(x) = \frac{2}{3} \left( 1 - \left( -\frac{1}{2} \right)^x \right) \quad (\text{A2})$$

This function oscillates  $(0, 1, \frac{1}{2}, \frac{3}{4}, \frac{5}{8}, \frac{11}{16}, \frac{21}{32}, \dots)$  and stabilizes at  $2/3$  after many cross-overs. (Note that heterozygosity under central fusion can be obtained from the result under terminal fusion noting that  $H_{cf} = 1 - H_{tf}/2$  and that  $H_{cf}(0) = 1$ ; Engelstädter *et al.* 2011). The second step is to assume that, in absence of interference, the number of crossovers  $X$  over a distance  $d$  follows a Poisson distribution with mean  $2d$  (recalling that 0.5 Morgan corresponds to one cross-over). We obtain

$$H(d) = \sum_{x=0}^{\infty} P(X = x) \frac{2}{3} \left( 1 - \left( -\frac{1}{2} \right)^x \right) \quad (\text{A3})$$

where  $P(X = x)$  is given by the Poisson distribution. We find

$$H(d) = \frac{2}{3} (1 - e^{-3d}) \quad (\text{A4})$$

(Engelstädter *et al.* 2011). The equivalent result under central fusion is

$$H(d) = 1 - \frac{1}{3}(1 - e^{-3d}) \quad (\text{A5})$$

(Rizet and Engelmann 1949; Barratt *et al.* 1954). In order to compute  $H(d)$  in presence of interference, we propose here to use Conway-Maxwell Poisson distribution (Sellers *et al.* 2012) that generalizes the Poisson distribution allowing for over or underdispersion (positive interference corresponding to underdispersion). This distribution adds a parameter  $\nu$  to control for the level of dispersion. Its probability density function is

$$P(X = x) = \frac{\lambda^x}{Z(\lambda, \nu)(x!)^\nu} \quad (\text{A6})$$

where  $Z(\lambda, \nu)$  is a normalization equal to  $\sum_x \lambda^x / (x!)^\nu$ , which can be expressed using the generalized hypergeometric function

$$Z(\lambda, \nu) = {}_0F_{\nu-1}(\emptyset, \mathbf{1}, \lambda), \quad (\text{A7})$$

where  $\mathbf{1}$  is a vector of 1 of dimension  $\nu-1$ . Using the probability density (A7) in Eq. (A6) yields an heterozygosity function  $H(d)$  for various degree of interference. This is illustrated in Figure 1. Strong interference leads to a non-monotonic mapping function as more evenly spaced cross over events will cause  $H(d)$  to reflect the oscillatory behavior of  $H(x)$  (Eq. A2). All mapping functions have a slope of two at  $d=0$  and tend to  $2/3$  for large  $d$ . Non monotonicity arises as soon as there is interference, but it becomes noticeably large for  $\nu \geq 2$ . This method can also be applied to obtain a standard mapping function  $M(d)$  expressing the recombination fraction as a function of the genetic distance. For instance using the Mather formula (Mather 1935)

$$M(d) = \frac{1}{2}(1 - P(X = 0)) = \frac{1}{2}(1 - Z(\lambda, \nu)^{-1}) \quad (\text{A8})$$

In both cases, the mapping requires to express  $H(d)$  or  $M(d)$  not in terms of  $\lambda$  the parameter of the COM-Poisson distribution, but in terms of  $d$  (which is half the expected number of cross over, i.e. half the mean of the COM-Poisson distribution). Here again, the mean of the COM-

Poisson can be expressed in terms of generalized hypergeometric functions, but a simpler approximation is sufficient for most purposes:

$$E(X) = 2d = (1 - e^{-2\lambda}) \left( \lambda^{1/\nu} - \frac{\nu - 1}{2\nu} \right) + \lambda e^{-4\lambda} \quad (\text{A9})$$

Supporting Figure S2 illustrates this mapping. The case  $\nu = 1$  corresponds to Haldane mapping, while  $\nu = 3$  is close to the Kosambi mapping used in *Drosophila* (Chen 2013). Note that heterozygosity with interference has already been treated by Barratt *et al.* (1954) for the case of central fusion, however using a less general model (necessitating more restrictive assumptions) than the models based on the COM-Poisson distribution (see also, Nace *et al.* 1970; Zhao and Speed 1998). The latter and other count models (e.g., Zhao *et al.* 1995) are increasingly used also to model interference in classical genetic mapping (e.g., Choi *et al.* 2013).

## References

- Barratt, R. W., D. Newmeyer, D. D. Perkins, and L. Garnjobst, 1954 Map construction in *Neurospora crassa*. *Adv. Genet.* 6: 1-93.
- Chen, Z., 2013 *Statistical methods for QTL mapping*. Chapman and Hall/CRC, New York.
- Choi, K., X. Zhao, K. A. Kelly, O. Venn, J. D. Higgins *et al.*, 2013 *Arabidopsis* meiotic crossover hotspots overlap with H2A.Z nucleosomes at gene promoters. *Nat. Genet.* 45: 1327-1336.
- Engelstädter, J., C. Sandrock, and C. Vorburger, 2011 Contagious parthenogenesis, automixis, and a sex determination meltdown. *Evolution* 65: 501-511.
- Mather, K., 1935 Reductional and equational separation of the chromosomes in bivalents and multivalents. *J. Genet.* 30: 53-78.
- Nace, G. W., C. M. Richards, and J. H. Asher, 1970 Parthenogenesis and genetic variability. I. Linkage and inbreeding estimations in the frog, *Rana pipiens*. *Genetics* 66: 349-368.
- Rizet, G., and C. Engelmann, 1949 Contribution à l'étude génétique d'un Ascomycète tétrasporé: *Podospora anserina* (Ces.) Rehm. *Rev. Cytol. Biol. Veg.* 11: 201-304.
- Sellers, K. F., S. Borle, and G. Shmueli, 2012 The COM-Poisson model for count data: a survey of methods and applications. *Appl. Stoch. Models Bus. Ind.* 28: 104-116.
- Zhao, H., and T. P. Speed, 1998 Statistical analysis of ordered tetrads. *Genetics* 150: 459-472.
- Zhao, H., T. P. T. P. Speed, and M. S. McPeck, 1995 Statistical analysis of crossover interference using the chi-square model. *Genetics* 139: 1045-1056.
