# Supplementary material
Source: PubMed Central journal article supplement (PMC4649641)
Supplement: 10.1534_115.179879_genetics.115.179879-9.pdf [file 10.1534_115.179879_genetics.115.179879-9.pdf]

**Supporting Table S1:** Microsatellite genotypes of parents and offspring as well as inferred parents (for offspring only). Potential parents indicate the parental clones that were placed in the buckets from which the offspring was obtained. B008 to B135 are the nine microsatellite loci used in this study (MOLECULAR ECOLOGY RESOURCES PRIMER DEVELOPMENT CONSORTIUM *et al.* 2011), with genotypes indicated by fragment lengths. (Table continued on next pages).

A. Microsatellite genotypes of parent clones.

| Clone ID  | MP/NMP | Bucket(s)                                        | B008    | B030    | B045    | B050    | B064    | B074    | B096    | B107    | B135    |
|-----------|--------|--------------------------------------------------|---------|---------|---------|---------|---------|---------|---------|---------|---------|
| 1MDM6     | NMP    | V01, V06                                         | 165/167 | 157/160 | 120/122 | 234/240 | 142/146 | 198/198 | 243/245 | 262/270 |         |
| AST-01-04 | NMP    | B20, B23, B26, V04, V10, V12                     | 163/163 | 155/157 | 122/122 | 237/240 | 138/144 | 198/200 | 239/245 | 272/278 | 187/191 |
| BN-08     | NMP    | V12                                              | 167/167 | 157/157 | 122/122 | 228/242 |         | 198/200 | 241/241 | 266/266 |         |
| BN-48     | NMP    | V05                                              | 163/179 | 159/159 | 120/122 | 228/245 | 140/140 | 200/200 | 239/241 | 270/272 |         |
| MOS-01-02 | NMP    | V09, V17                                         | 163/172 | 155/163 | 122/122 | 237/240 | 138/138 | 196/198 | 241/241 | 270/270 |         |
| MOS-01-04 | NMP    | B20, B23, B26, V12, V18                          | 167/172 | 160/160 | 122/122 | 232/232 | 144/144 | 198/198 | 241/241 | 270/278 | 189/191 |
| RM1-02    | NMP    | V21                                              | 167/167 | 155/160 | 122/122 | 235/235 | 144/146 | 198/200 | 243/243 | 268/280 |         |
| VV2       | NMP    | B20, B23, B26, V01, V02, V05, V06, V08, V09, V12 | 157/165 | 153/157 | 122/122 | 226/244 | 138/144 | 198/202 | 239/243 | 270/270 | 187/189 |
| RM1-18    | MP     | B22, B25, B28                                    | 167/172 | 155/155 | 127/127 | 237/237 |         |         |         |         | 187/191 |
| RM1-22    | MP     | B22, B25, B28                                    | 161/167 | 155/160 | 122/122 | 232/232 |         |         |         |         | 191/191 |
| RM1-35    | MP     | B22, B25, B28                                    | 172/172 | 155/160 | 120/122 | 237/237 |         |         |         |         | 189/189 |
| RM1-39    | MP     | B22, B25, B28                                    | 167/169 | 155/155 | 122/122 | 232/242 |         |         |         |         | 189/189 |

B. Microsatellite genotypes of offspring.

| Hatchling ID | Treatment  | Bucket ID | Potential parents | B008<br>25 cM | B030<br>33 cM | B045    | B050    | B064    | B074    | B096    | B107    | B135 | Parent1   | Parent2 | Outcrossed |
|--------------|------------|-----------|-------------------|---------------|---------------|---------|---------|---------|---------|---------|---------|------|-----------|---------|------------|
| V02-01       | NMP_single | V02       | VV2               | 165/165       | 153/157       | 122/122 | 226/244 | 138/138 | 198/202 | 239/243 | 270/270 |      | VV2       |         | No         |
| V02-03       | NMP_single | V02       | VV2               | 157/157       | 153/157       | 122/122 | 226/244 | 144/144 | 198/198 | 243/243 | 270/270 |      | VV2       |         | No         |
| V04-01       | NMP_single | V04       | AST-01-04         | 163/163       | 155/157       | 122/122 | 237/240 | 138/144 | 198/200 | 239/239 | 272/278 |      | AST-01-04 |         | No         |
| V04-02       | NMP_single | V04       | AST-01-04         | 163/163       | 155/157       | 122/122 | 237/240 | 138/138 | 198/200 | 239/245 | 278/278 |      | AST-01-04 |         | No         |
| V04-03       | NMP_single | V04       | AST-01-04         | 163/163       | 157/157       | 122/122 | 237/240 | 138/144 | 198/200 | 245/245 | 272/272 |      | AST-01-04 |         | No         |
| V04-05       | NMP_single | V04       | AST-01-04         | 163/163       | 157/157       | 122/122 | 237/240 | 138/144 | 198/200 | 239/239 | 272/278 |      | AST-01-04 |         | No         |
| V04-06       | NMP_single | V04       | AST-01-04         | 163/163       | 155/157       | 122/122 | 237/240 | 138/144 | 198/200 | 245/245 | 272/278 |      | AST-01-04 |         | No         |
| V04-11       | NMP_single | V04       | AST-01-04         | 163/163       | 155/157       | 122/122 | 237/237 | 144/144 | 198/200 | 245/245 |         |      | AST-01-04 |         | No         |
| V04-14       | NMP_single | V04       | AST-01-04         | 163/163       | 157/157       | 122/122 | 237/240 | 138/144 |         |         | 272/278 |      | AST-01-04 |         | No         |
| V04-18       | NMP_single | V04       | AST-01-04         | 163/163       | 155/157       | 122/122 | 237/240 | 138/138 | 198/200 | 239/239 | 272/272 |      | AST-01-04 |         | No         |
| V04-19       | NMP_single | V04       | AST-01-04         | 163/163       | 157/157       | 122/122 | 237/240 | 144/144 | 198/200 | 245/245 |         |      | AST-01-04 |         | No         |
| V04-22       | NMP_single | V04       | AST-01-04         | 163/163       | 155/157       | 122/122 | 237/240 | 144/144 | 198/200 | 239/239 | 272/272 |      | AST-01-04 |         | No         |
| V04-23       | NMP_single | V04       | AST-01-04         | 163/163       | 155/157       | 122/122 | 237/240 | 138/138 | 198/200 | 239/245 | 272/278 |      | AST-01-04 |         | No         |
| V04-24       | NMP_single | V04       | AST-01-04         | 163/163       | 155/157       | 122/122 | 237/240 | 138/144 | 198/200 | 245/245 | 272/278 |      | AST-01-04 |         | No         |
| V04-25       | NMP_single | V04       | AST-01-04         | 163/163       | 155/157       | 122/122 | 237/240 | 138/138 | 198/200 | 239/239 | 272/278 |      | AST-01-04 |         | No         |
| V04-27       | NMP_single | V04       | AST-01-04         | 163/163       | 157/157       | 122/122 | 237/240 | 138/144 | 198/200 | 239/239 | 272/278 |      | AST-01-04 |         | No         |
| V08-01       | NMP_single | V08       | VV2               | 165/165       | 153/153       | 122/122 | 244/244 | 138/144 | 198/202 | 239/243 | 270/270 |      | VV2       |         | No         |
| V08-02       | NMP_single | V08       | VV2               | 157/157       | 157/157       | 122/122 | 226/244 | 138/144 | 198/198 | 239/239 | 270/270 |      | VV2       |         | No         |
| V08-03       | NMP_single | V08       | VV2               | 165/165       | 153/157       | 122/122 | 226/244 | 138/144 | 198/202 | 239/243 | 270/270 |      | VV2       |         | No         |
| V10-01       | NMP_single | V10       | AST-01-04         | 163/163       | 155/157       | 122/122 | 240/240 | 138/144 | 198/198 | 239/245 | 272/278 |      | AST-01-04 |         | No         |
| V10-02       | NMP_single | V10       | AST-01-04         | 163/163       | 155/157       | 122/122 | 237/237 | 138/144 | 198/200 | 239/245 | 272/278 |      | AST-01-04 |         | No         |
| V10-03       | NMP_single | V10       | AST-01-04         | 163/163       | 155/157       | 122/122 | 237/237 | 138/144 | 198/200 | 239/245 | 272/278 |      | AST-01-04 |         | No         |
| V21-03       | NMP_single | V21       | RM1-02            | 167/167       | 160/160       | 122/122 | 235/235 | 146/146 | 198/200 | 243/243 | 268/280 |      | RM1-02    |         | No         |
| V21-04       | NMP_single | V21       | RM1-02            | 167/167       | 160/160       | 122/122 | 235/235 | 144/146 | 200/200 | 243/243 | 268/268 |      | RM1-02    |         | No         |

Table S1B continued.

| Hatchling ID | Treatment  | Bucket ID | Potential parents                | B008    | B030    | B045    | B050    | B064    | B074    | B096    | B107    | B135 | Parent1   | Parent2 | Outcrossed |
|--------------|------------|-----------|----------------------------------|---------|---------|---------|---------|---------|---------|---------|---------|------|-----------|---------|------------|
| V21-05       | NMP_single | V21       | RM1-02                           | 167/167 | 160/160 | 122/122 | 235/235 | 144/146 | 200/200 | 243/243 | 268/280 |      | RM1-02    |         | No         |
| V21-07       | NMP_single | V21       | RM1-02                           | 167/167 | 155/160 | 122/122 | 235/235 | 144/144 | 198/200 | 243/243 | 268/268 |      | RM1-02    |         | No         |
| V21-08       | NMP_single | V21       | RM1-02                           | 167/167 | 160/160 | 122/122 | 235/235 | 144/146 | 198/200 | 243/243 | 280/280 |      | RM1-02    |         | No         |
| V01-02       | NMP_mix    | V01       | 1MDM6, VV2                       | 157/165 | 153/153 | 122/122 | 226/244 | 138/144 | 198/202 | 239/243 | 270/270 |      | VV2       |         | No         |
| V01-06       | NMP_mix    | V01       | 1MDM6, VV2                       | 165/165 | 157/157 | 122/122 | 226/244 | 138/138 | 198/198 | 239/243 |         |      | VV2       |         | No         |
| V01-07       | NMP_mix    | V01       | 1MDM6, VV2                       | 157/165 | 153/157 | 122/122 |         | 138/144 |         |         |         |      | VV2       |         | No         |
| V05-01       | NMP_mix    | V05       | BN-48, VV2                       | 165/165 | 153/157 | 122/122 | 226/244 | 138/138 | 198/202 | 239/243 | 270/270 |      | VV2       |         | No         |
| V05-02       | NMP_mix    | V05       | BN-48, VV2                       | 157/165 | 153/157 | 122/122 | 244/244 | 138/138 | 198/202 | 239/239 | 270/270 |      | VV2       |         | No         |
| V05-04       | NMP_mix    | V05       | BN-48, VV2                       | 165/165 | 157/157 | 122/122 | 226/244 | 138/144 | 198/202 |         | 270/270 |      | VV2       |         | No         |
| V05-05       | NMP_mix    | V05       | BN-48, VV2                       | 165/165 | 153/153 | 122/122 | 226/244 | 138/138 | 198/202 |         | 270/270 |      | VV2       |         | No         |
| V05-07       | NMP_mix    | V05       | BN-48, VV2                       | 165/165 | 153/153 | 122/122 | 226/226 | 144/144 | 198/202 | 239/243 | 270/270 |      | VV2       |         | No         |
| V05-09       | NMP_mix    | V05       | BN-48, VV2                       | 157/165 | 153/157 | 122/122 | 226/244 | 144/144 | 198/202 |         | 270/270 |      | VV2       |         | No         |
| V05-10       | NMP_mix    | V05       | BN-48, VV2                       | 165/165 | 153/153 | 122/122 | 226/244 | 138/144 | 198/198 | 243/243 | 270/270 |      | VV2       |         | No         |
| V06-01       | NMP_mix    | V06       | 1MDM6, VV2                       | 165/167 | 157/160 | 122/122 |         | 142/146 | 198/198 |         |         |      | 1MDM6     |         | No         |
| V09-06       | NMP_mix    | V09       | MOS-01-02, VV2                   | 157/165 | 153/157 | 122/122 | 226/244 | 144/144 | 202/202 | 243/243 | 270/270 |      | VV2       |         | No         |
| V09-09       | NMP_mix    | V09       | MOS-01-02, VV2                   | 157/165 | 153/157 | 122/122 | 244/244 | 138/144 | 198/202 | 239/243 | 270/270 |      | VV2       |         | No         |
| V09-10       | NMP_mix    | V09       | MOS-01-02, VV2                   | 157/165 | 153/157 | 122/122 | 226/226 | 138/144 | 198/198 | 239/239 | 270/270 |      | VV2       |         | No         |
| V12-01       | NMP_mix    | V12       | AST-01-04, BN-08, MOS-01-04, VV2 | 157/165 | 153/157 | 122/122 | 244/244 | 138/138 | 198/202 | 239/243 | 270/270 |      | VV2       |         | No         |
| V12-02       | NMP_mix    | V12       | AST-01-04, BN-08, MOS-01-04, VV2 | 167/167 | 160/160 | 122/122 | 232/232 | 144/144 | 198/198 | 241/241 | 270/270 |      | MOS-01-04 |         | No         |
| V17-01       | NMP_mix    | V17       | MOS-01-02, MOS-01-04             | 167/172 | 160/160 | 122/122 | 232/232 | 144/144 | 198/198 | 241/241 | 270/270 |      | MOS-01-04 |         | No         |
| V17-02       | NMP_mix    | V17       | MOS-01-02, MOS-01-04             | 167/167 | 160/160 | 122/122 | 232/232 | 144/144 | 198/198 | 241/241 | 270/278 |      | MOS-01-04 |         | No         |
| V17-03       | NMP_mix    | V17       | MOS-01-02, MOS-01-04             | 167/172 | 160/160 | 122/122 | 232/232 | 144/144 | 198/198 | 241/241 | 270/278 |      | MOS-01-04 |         | No         |
| V17-04       | NMP_mix    | V17       | MOS-01-02, MOS-01-04             | 172/172 | 160/160 | 122/122 | 232/232 | 144/144 | 198/198 | 241/241 |         |      | MOS-01-04 |         | No         |

Table S1B continued.

| Hatchling ID | Treatment | Bucket ID | Potential parents              | B008    | B030    | B045    | B050    | B064 | B074 | B096 | B107 | B135    | Parent1   | Parent2 | Outcrossed |
|--------------|-----------|-----------|--------------------------------|---------|---------|---------|---------|------|------|------|------|---------|-----------|---------|------------|
| B20-01       | NMP_mix   | B20       | AST-01-04, MOS-01-04, VV2      | 167/172 | 160/160 | 122/122 | 232/232 |      |      |      |      | 189/191 | MOS-01-04 |         | No         |
| B23-01       | NMP_mix   | B23       | AST-01-04, MOS-01-04, VV2      | 167/167 | 160/160 | 122/122 | 232/232 |      |      |      |      | 189/189 | MOS-01-04 |         | No         |
| B23-02       | NMP_mix   | B23       | AST-01-04, MOS-01-04, VV2      | 157/165 | 153/157 | 122/122 | 226/244 |      |      |      |      | 187/189 | VV2       |         | No         |
| B23-03       | NMP_mix   | B23       | AST-01-04, MOS-01-04, VV2      | 172/172 | 160/160 | 122/122 | 232/232 |      |      |      |      | 191/191 | MOS-01-04 |         | No         |
| B26-01       | NMP_mix   | B26       | AST-01-04, MOS-01-04, VV2      | 163/163 | 157/157 | 122/122 | 237/240 |      |      |      |      | 187/191 | AST-01-04 |         | No         |
| B22-11       | MP_mix    | B22       | RM1-18, RM1-22, RM1-35, RM1-39 | 167/172 | 155/155 | 122/127 | 232/232 |      |      |      |      | 187/191 | RM1-18    | RM1-22  | Yes        |
| B22-12       | MP_mix    | B22       | RM1-18, RM1-22, RM1-35, RM1-39 | 167/169 | 155/155 | 122/122 | 232/232 |      |      |      |      | 189/191 | RM1-22    | RM1-39  | Yes        |
| B22-13       | MP_mix    | B22       | RM1-18, RM1-22, RM1-35, RM1-39 | 167/169 | 155/160 | 122/122 | 232/232 |      |      |      |      | 189/191 | RM1-22    | RM1-39  | Yes        |
| B22-14       | MP_mix    | B22       | RM1-18, RM1-22, RM1-35, RM1-39 | 167/172 | 155/155 | 122/122 | 232/237 |      |      |      |      | 189/191 | RM1-22    | RM1-35  | Yes        |
| B22-15       | MP_mix    | B22       | RM1-18, RM1-22, RM1-35, RM1-39 | 167/169 |         | 122/122 |         |      |      |      |      | 189/191 | RM1-22    | RM1-39  | Yes        |
| B22-16       | MP_mix    | B22       | RM1-18, RM1-22, RM1-35, RM1-39 | 161/172 |         | 122/127 |         |      |      |      |      | 187/191 | RM1-18    | RM1-22  | Yes        |
| B22-17       | MP_mix    | B22       | RM1-18, RM1-22, RM1-35         | 167/167 |         | 122/127 |         |      |      |      |      | 191/191 | RM1-18    | RM1-22  | Yes        |
| B22-18       | MP_mix    | B22       | RM1-18, RM1-22, RM1-35         | 167/172 |         | 120/127 |         |      |      |      |      | 189/191 | RM1-18    | RM1-35  | Yes        |
| B25-11       | MP_mix    | B25       | RM1-18, RM1-22, RM1-35         | 167/169 | 155/155 | 122/122 |         |      |      |      |      | 189/191 | RM1-22    | RM1-39  | Yes        |
| B25-12       | MP_mix    | B25       | RM1-18, RM1-22, RM1-35         | 167/169 | 155/155 | 122/127 | 237/242 |      |      |      |      | 187/189 | RM1-18    | RM1-39  | Yes        |
| B25-13       | MP_mix    | B25       | RM1-18, RM1-22, RM1-35         | 167/169 | 155/155 | 122/122 | 232/232 |      |      |      |      | 189/191 | RM1-22    | RM1-39  | Yes        |
| B25-14       | MP_mix    | B25       | RM1-18, RM1-22, RM1-35         |         | 155/160 |         |         |      |      |      |      | 189/189 | RM1-35    | RM1-39  | Yes        |
| B25-15       | MP_mix    | B25       | RM1-18, RM1-22, RM1-35         | 161/167 |         | 122/122 |         |      |      |      |      | 191/191 | RM1-22    |         | No         |
| B25-16       | MP_mix    | B25       | RM1-18, RM1-22, RM1-35         | 167/169 |         | 122/122 |         |      |      |      |      | 189/191 | RM1-22    | RM1-39  | Yes        |

Table S1B continued.

| Hatchling ID | Treatment | Bucket ID | Potential parents      | B008    | B030    | B045    | B050    | B064 | B074 | B096 | B107 | B135    | Parent1 | Parent2          | Outcrossed |
|--------------|-----------|-----------|------------------------|---------|---------|---------|---------|------|------|------|------|---------|---------|------------------|------------|
| B25-17       | MP_mix    | B25       | RM1-18, RM1-22, RM1-35 | 167/169 |         | 122/122 |         |      |      |      |      | 189/191 | RM1-22  | RM1-39           | Yes        |
| B25-18       | MP_mix    | B25       | RM1-18, RM1-22, RM1-35 |         |         | 120/122 |         |      |      |      |      | 189/191 | RM1-22  | RM1-35           | Yes        |
| B28-11       | MP_mix    | B28       | RM1-18, RM1-22, RM1-35 | 161/172 | 155/155 | 122/127 | 232/237 |      |      |      |      | 191/191 | RM1-18  | RM1-22           | Yes        |
| B28-12       | MP_mix    | B28       | RM1-18, RM1-22, RM1-35 | 161/172 | 155/160 | 122/127 | 232/237 |      |      |      |      |         | RM1-18  | RM1-22           | Yes        |
| B28-13       | MP_mix    | B28       | RM1-18, RM1-22, RM1-35 | 169/172 | 155/155 | 122/122 | 237/242 |      |      |      |      |         | RM1-35  | RM1-39           | Yes        |
| B28-14       | MP_mix    | B28       | RM1-18, RM1-22, RM1-35 | 161/167 | 155/155 | 122/127 | 232/237 |      |      |      |      | 187/191 | RM1-18  | RM1-22           | Yes        |
| B28-17       | MP_mix    | B28       | RM1-18, RM1-22, RM1-35 | 167/172 |         | 122/127 |         |      |      |      |      | 189/191 | RM1-18  | RM1-35 or RM1-39 | Yes        |
| B28-18       | MP_mix    | B28       | RM1-18, RM1-22, RM1-35 | 167/167 |         | 122/127 |         |      |      |      |      | 191/191 | RM1-18  | RM1-22           | Yes        |
| B28-19       | MP_mix    | B28       | RM1-18, RM1-22, RM1-35 | 161/172 |         | 122/122 |         |      |      |      |      | 189/191 | RM1-22  | RM1-35           | Yes        |
| B28-20       | MP_mix    | B28       | RM1-18, RM1-22, RM1-35 | 167/172 |         | 122/127 |         |      |      |      |      | 191/191 | RM1-18  | RM1-22           | Yes        |
