# Supplementary material
Source: PubMed Central journal article supplement (PMC4649641)
Supplement: 10.1534_115.179879_genetics.115.179879-10.pdf [file 10.1534_115.179879_genetics.115.179879-10.pdf]

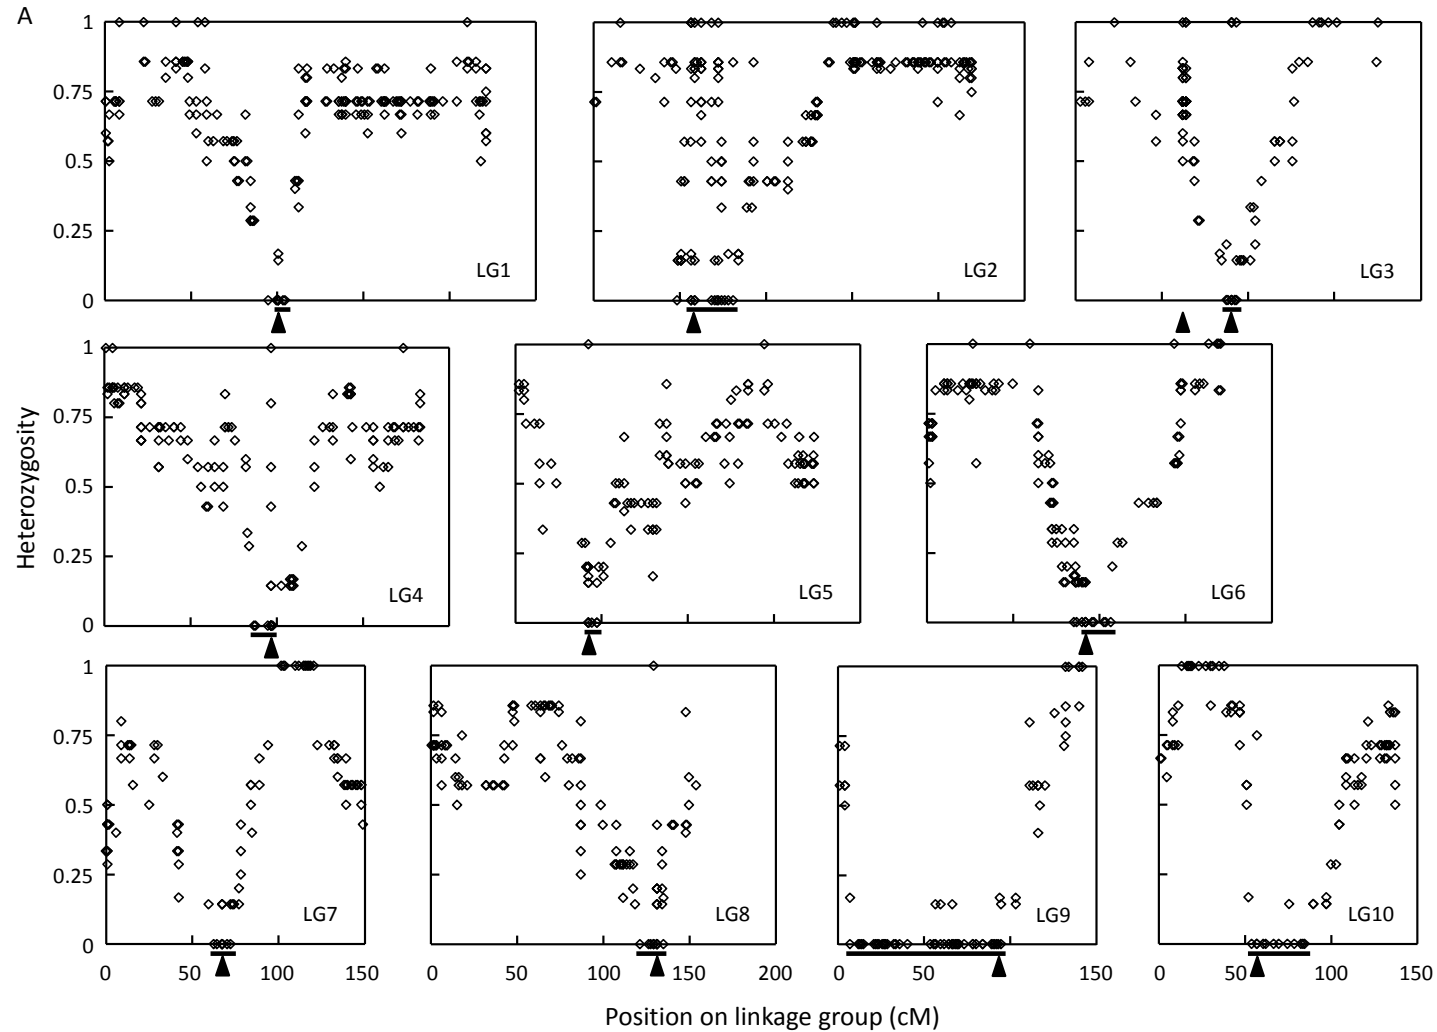

**Supporting Figure S1:** (A) Heterozygosity among the seven offspring of the AST-01-04 NMP clone produced by terminal fusion, depending on marker position on the linkage groups of *D. magna*. The bar below each linkage group shows the region around the presumed centromere in which offspring V04-04 was heterozygous, and the triangle shows the presumed centromere location (two in case of LG3). (Figure continued on next page)

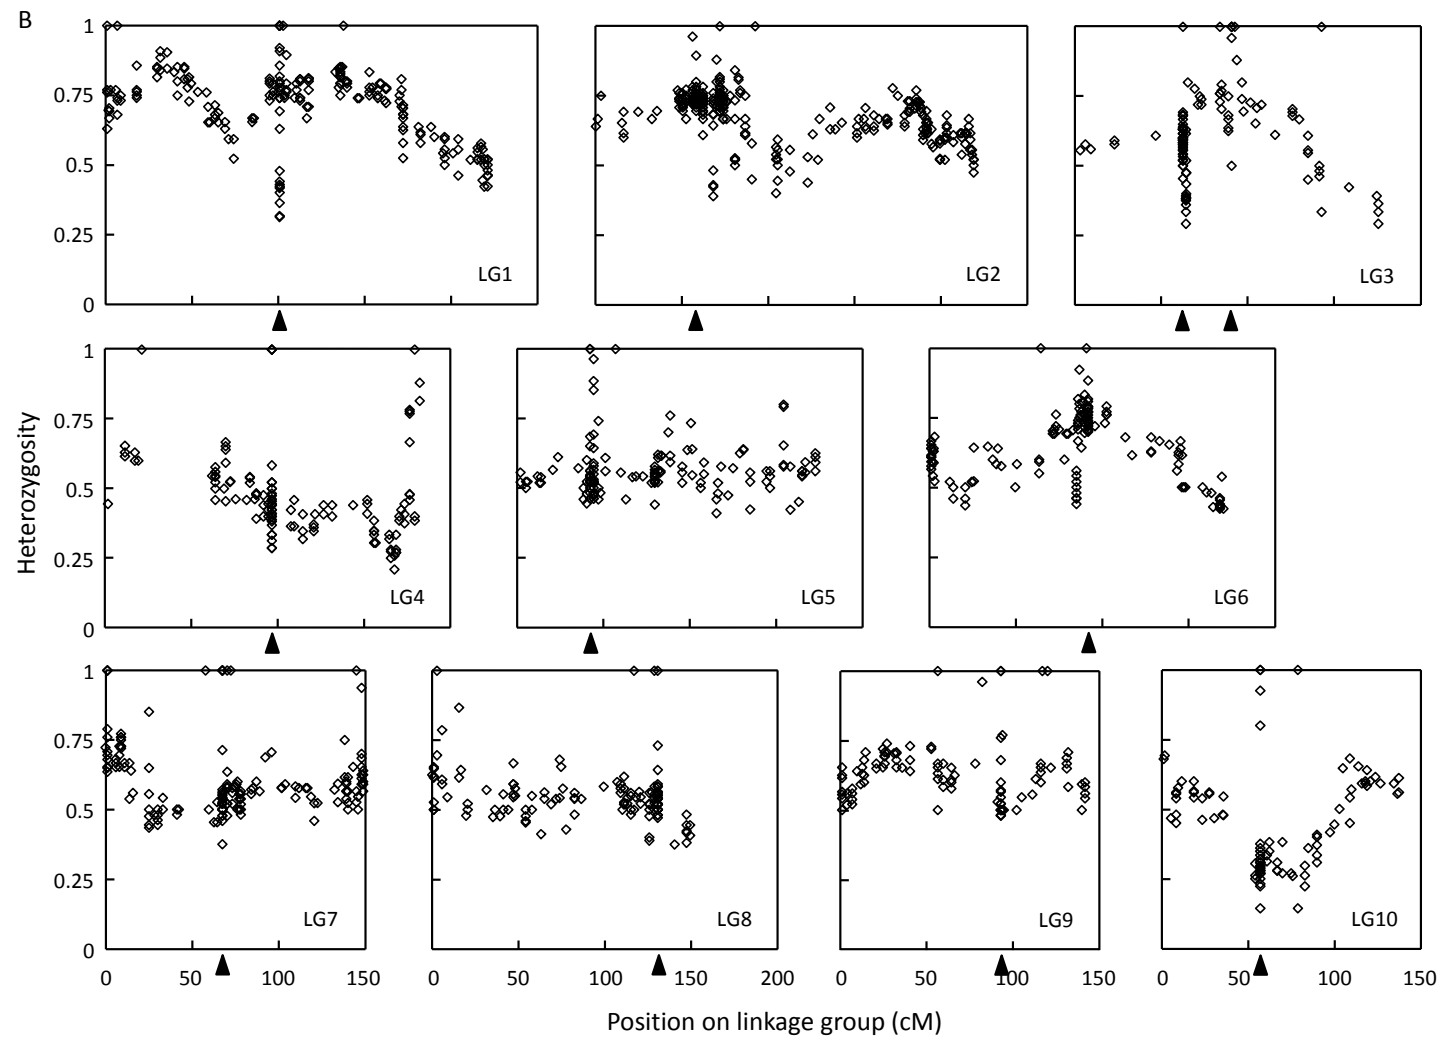

**Supporting Figure S1:** (B) Heterozygosity among the 27 offspring of the RM1-18 MP clone.
