# Supplementary material
Source: PubMed Central journal article supplement (PMC4649641)
Supplement: 10.1534_115.179879_genetics.115.179879-13.pdf [file 10.1534_115.179879_genetics.115.179879-13.pdf]

**Supporting Table S4:** The ten most frequently observed segregation patterns among the eight offspring of the AST-01-04 NMP clone. All other segregation patterns occurred for fewer loci or on a smaller number of linkage groups.

| Linkage group | <i>N</i> loci total <sup>a</sup> | <i>N</i> loci (11111111) <sup>b</sup> | <i>N</i> loci (00000000) <sup>b</sup> | <i>N</i> loci (00000001) <sup>b</sup> | <i>N</i> loci (01000001) <sup>b</sup> | <i>N</i> loci (11011100) <sup>b</sup> | <i>N</i> loci (10011111) <sup>b</sup> | <i>N</i> loci (11111101) <sup>b</sup> | <i>N</i> loci (11111011) <sup>b</sup> | <i>N</i> loci (11110110) <sup>b</sup> | <i>N</i> loci (11110011) <sup>b</sup> |
|---------------|----------------------------------|---------------------------------------|---------------------------------------|---------------------------------------|---------------------------------------|---------------------------------------|---------------------------------------|---------------------------------------|---------------------------------------|---------------------------------------|---------------------------------------|
| LG1           | 275                              | 1                                     | 10                                    | 22                                    | 1                                     |                                       | 108                                   |                                       | 28                                    | 5                                     | 4                                     |
| LG2           | 246                              | 17                                    | 1                                     | 24                                    | 13                                    |                                       |                                       | 81                                    |                                       | 4                                     | 6                                     |
| LG3           | 199                              | 21                                    | 2                                     | 21                                    | 1                                     | 109                                   |                                       |                                       |                                       |                                       |                                       |
| LG4           | 174                              | 2                                     | 1                                     | 37                                    | 2                                     |                                       |                                       |                                       | 19                                    |                                       | 8                                     |
| LG5           | 122                              | 2                                     |                                       | 12                                    | 6                                     |                                       |                                       |                                       | 1                                     |                                       |                                       |
| LG6           | 173                              | 2                                     |                                       | 33                                    | 9                                     |                                       |                                       |                                       |                                       | 11                                    | 8                                     |
| LG7           | 119                              |                                       |                                       | 35                                    | 5                                     |                                       |                                       |                                       |                                       |                                       |                                       |
| LG8           | 131                              | 4                                     |                                       | 18                                    |                                       |                                       |                                       |                                       |                                       | 23                                    |                                       |
| LG9           | 150                              |                                       | 2                                     | 106                                   | 5                                     |                                       |                                       |                                       |                                       |                                       |                                       |
| LG10          | 104                              | 15                                    | 1                                     | 24                                    | 6                                     |                                       |                                       | 5                                     |                                       |                                       |                                       |
| <b>Sum</b>    | <b>1693</b>                      | <b>64</b>                             | <b>17</b>                             | <b>332</b>                            | <b>48</b>                             | <b>109</b>                            | <b>108</b>                            | <b>86</b>                             | <b>48</b>                             | <b>43</b>                             | <b>26</b>                             |

<sup>a</sup>Only without missing values for any of the eight offspring

<sup>b</sup>Offspring are ordered in the following way: V10\_03, V04\_01, V04\_16, V04\_18, V04\_22, V04\_25, V04\_27, V04\_04, 1 = heterozygous, 0 = homozygous.
